# Supplementary material for: MOF-derived ternary ZnCo–Ni LDHs for high-energy-density supercapacitors: synergistic effects and enhanced ion transfer
Source: Royal Society of Chemistry journal article supplement (doi:10.1039/d5ra09868h), 2026-04-22
Supplement: d5ra09868h1.pdf [file d5ra09868h1.pdf]

## Supporting Information

### **MOF-Derived Ternary ZnCo-Ni LDHs for High-Energy-Density Supercapacitors: Synergistic Effects and Enhanced Ion Transfer**

Gaofu Liu<sup>a,b,1</sup>, Kunyu Hao<sup>b,1</sup>, Zhuanyu Liu<sup>b</sup>, Yiwen Tang<sup>\*b</sup>, Yonggang Wu<sup>\*a</sup>

a School of Physics and Electronic Science, Guizhou Education University, Guiyang  
550018, P. R. China

b Institute of Nano-Science and Technology, College of Physical Science and  
Technology, Central China Normal University, Wuhan, 430079, China

\*Corresponding author: Yiwen Tang, Tel: +86-27-67867947; Fax: +86-27-67861185;  
e-mail: [ywtang@ccnu.edu.cn](mailto:ywtang@ccnu.edu.cn)

\*Corresponding author: Yonggang Wu, e-mail: [ygwu0946@163.com](mailto:ygwu0946@163.com)

<sup>1</sup>These authors contribute equally to this work.

## 1. Sample Characterization

Sample characterization methods: An Empyrean-type X-ray diffractometer (Cu K $\alpha$  line  $\lambda = 1.5418 \text{ \AA}$ ) was used to obtain the XRD pattern, which was compared with the standard cards to determine the phase. The morphology and structure of the samples were characterized by field emission scanning electron microscope (SEM) (JSM-6700F, JEOL) and transmission electron microscope (TEM) (JEM-2010FEF, JEOL). The elemental content of the samples was analyzed by energy-dispersive spectrometer (EDS). A VG Multilab 2000 type X-ray photoelectron spectrometer (XPS) was used to determine the chemical components and element valence states on the sample surface, and the characteristic peak of C 1s at 284.6 eV was used as a reference for calibrating the binding energies of the elements. A Raman spectrometer (laser wavelength of 532 nm) was used to obtain the Raman spectrum of the sample.

## 2 Electrochemical Testing

Electrochemical testing methods: The CHI760 electrochemical workstation was used to conduct electrochemical tests on the samples. ZCN-LDHs-180<sub>2h</sub> was used as the working electrode, a platinum sheet as the counter electrode, and Hg/HgO as the reference electrode. In a 2 M KOH aqueous solution at room temperature, three-electrode electrochemical tests of cyclic voltammetry (CV), galvanostatic charge-discharge (GCD), electrochemical impedance (EIS, frequency range of 0.01 Hz - 10 kHz), and cycling stability were carried out within a voltage range of 0 to 0.6 V.

The specific capacitance, energy density, and power density in the three-electrode system and the assembled asymmetric supercapacitor were calculated by the following formulas:

$$C_{cv} = (\int i dV) / (v \times m \times \Delta V) \quad (1)$$

$C_{cv}$  is the specific capacitance calculation based on the CV curve, where  $\int i dV$  is the integral area of the CV curve,  $v$  is the scan rate,  $m$  is the mass of the active material, and  $\Delta V$  is the working-potential range.

$$C_{GCD} = (I \times \delta t) / (m \times \Delta V) \quad (2)$$

$C_{\text{GCD}}$  is the specific capacitance calculation based on the GCD curve, where  $I$  is the discharge current (A),  $m$  is the mass of the active material (g),  $\delta t$  is the discharge time, and  $\Delta V$  is the working-potential range.

When assembling a supercapacitor, first, according to the charge balance theory, the loading amounts of the positive and negative active materials were matched based on their specific capacitance and voltage ranges. The specific calculation is as follows:

$$m_+ \times C_+ \times \Delta V_+ = m_- \times C_- \times \Delta V_- \quad (3)$$

$m_+$  and  $m_-$  are the loadings of the positive and negative electrode active materials, respectively, and  $C_+$ ,  $C_-$ ,  $\Delta V_+$ , and  $\Delta V_-$  are the specific capacitances and voltage windows of the positive and negative electrodes, respectively.

$$E = 0.5C \times \Delta V^2 \quad (4)$$

$$P = E / \Delta t \quad (5)$$

$C$  represents the specific capacitance of the electrode material ( $\text{F g}^{-1}$ ),  $\Delta V$  is the working potential range,  $E$  is the energy density,  $P$  is the power density, and  $\Delta t$  is the discharge time.

### 3 Supporting figures and tables

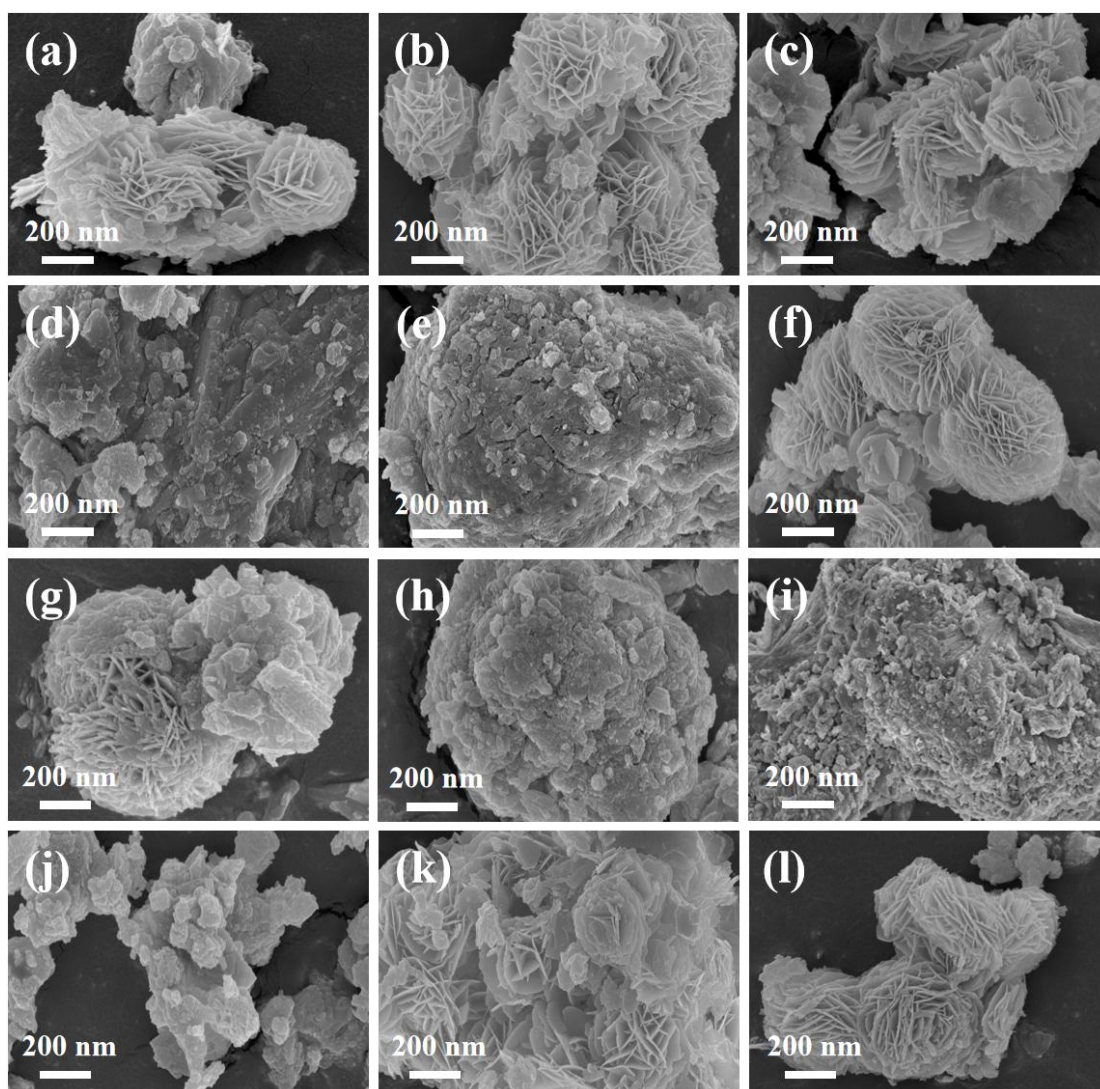

**Fig. S1** SEM images of all ZCN-LDHs samples with different Zn/Co/Ni ratios: (a) ZCN-LDHs<sub>1</sub>-180<sub>2h</sub>, (b) ZCN-LDHs-180<sub>2h</sub>, (c) ZCN-LDHs<sub>2</sub>-180<sub>2h</sub>, (d) ZCN-LDHs<sub>3</sub>-180<sub>2h</sub>, (e) ZCN-LDHs<sub>4</sub>-180<sub>2h</sub>, (f) ZCN-LDHs<sub>5</sub>-180<sub>2h</sub>, (g) ZCN-LDHs<sub>6</sub>-180<sub>2h</sub>, (h) ZCN-LDHs<sub>7</sub>-180<sub>2h</sub>, (i) ZCN-LDHs<sub>8</sub>-180<sub>2h</sub>, (j) ZCN-LDHs<sub>9</sub>-180<sub>2h</sub>, (k) ZCN-LDHs<sub>10</sub>-180<sub>2h</sub> and (l) ZCN-LDHs<sub>11</sub>-180<sub>2h</sub>.

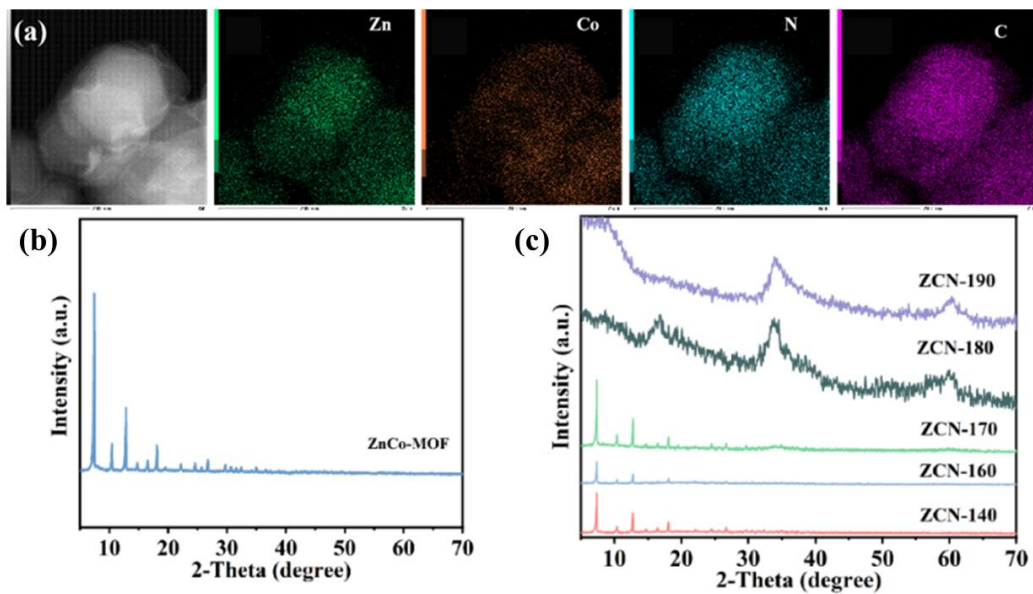

**Fig. S2** (a) EDS images, (b) XRD pattern of ZnCo-MOF precursor and (c) XRD patterns of products at different temperatures of 140, 160, 170, 180, and 190 °C via solvothermal method.

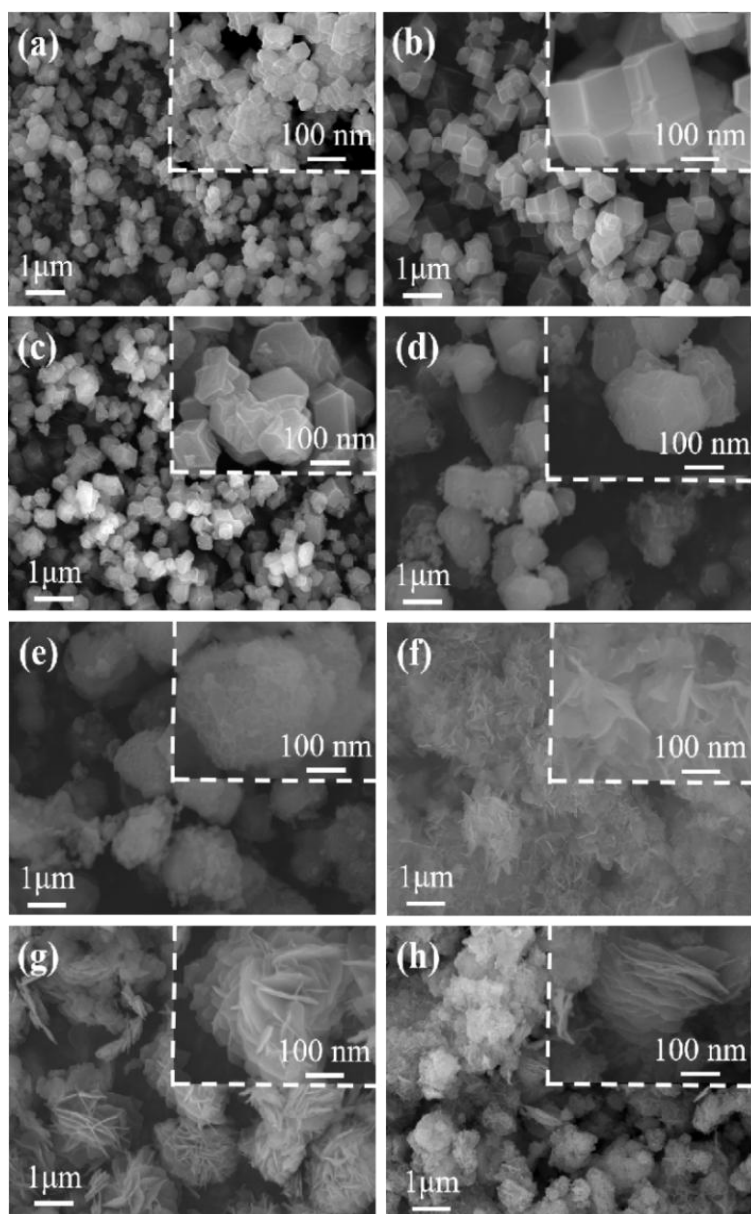

**Fig. S3** SEM images of samples (a) Zn-MOF, (b) Co-MOF, (c) ZnCo-MOF, (d) ZCN-LDHs-140, (e) ZCN-LDHs-160, (f) ZCN-LDHs-170, (g) ZCN-LDHs-180 and (h) ZCN-LDHs-190.

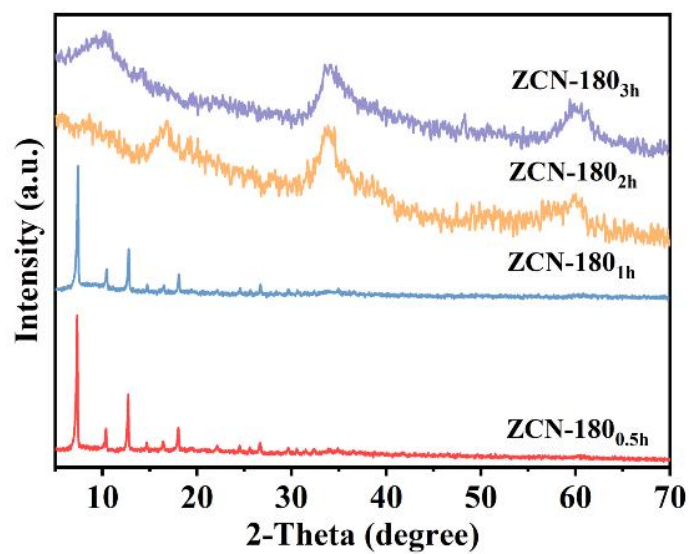

**Fig. S4** XRD patterns of products at 180 °C for different reaction times of 0.5 h, 1 h, 2 h, and 3 h.

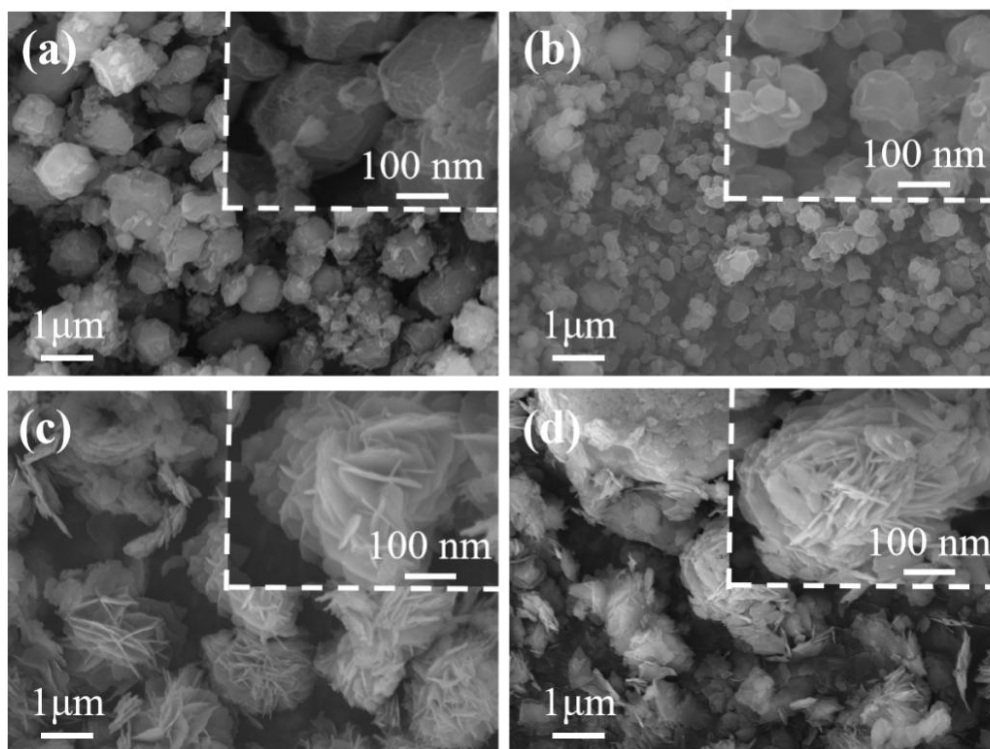

**Fig. S5** SEM images of (a) ZCN-LDHs-180<sub>0.5h</sub>, (b) ZCN-LDHs-180<sub>1h</sub>, (c) ZCN-LDHs-180<sub>2h</sub> and (d) ZCN-LDHs-180<sub>3h</sub>.

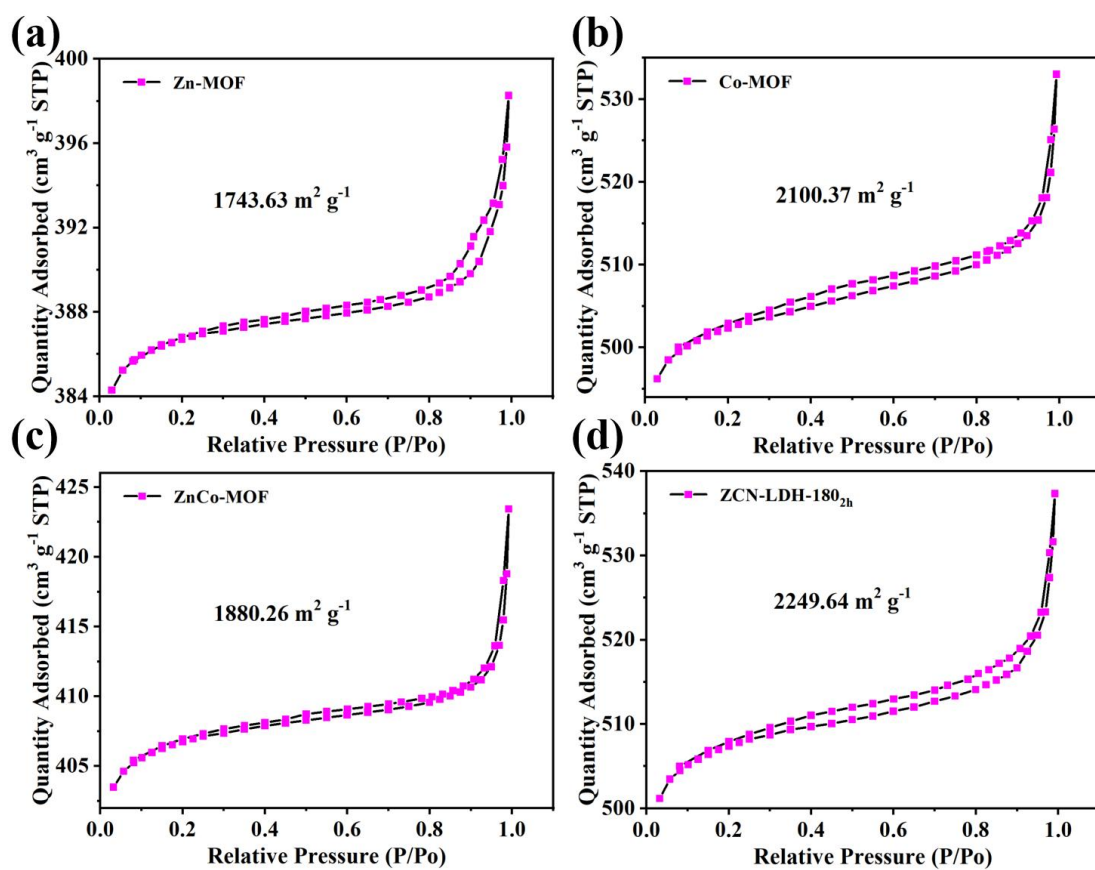

**Fig. S6**  $N_2$  adsorption-desorption isotherms of (a) Zn-MOF, (b) Co-MOF, (c) ZnCo-MOF and (d) ZCN-LDH-180<sub>2h</sub>.

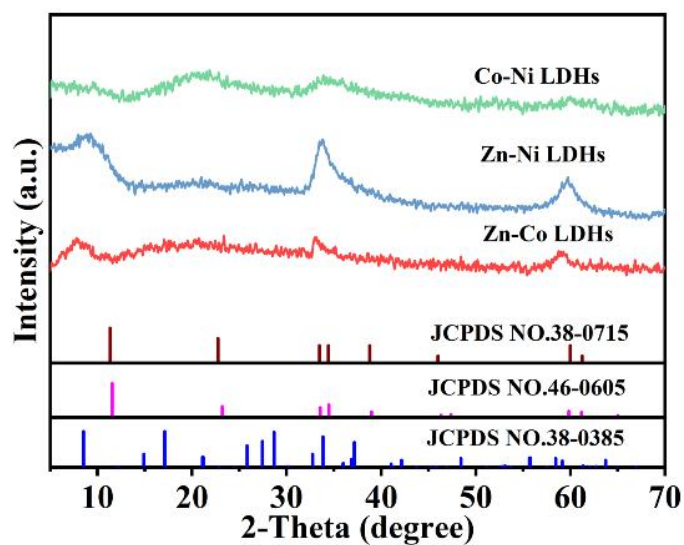

**Fig. S7** XRD patterns of ZC-LDHs, ZN-LDHs and CN-LDHs.

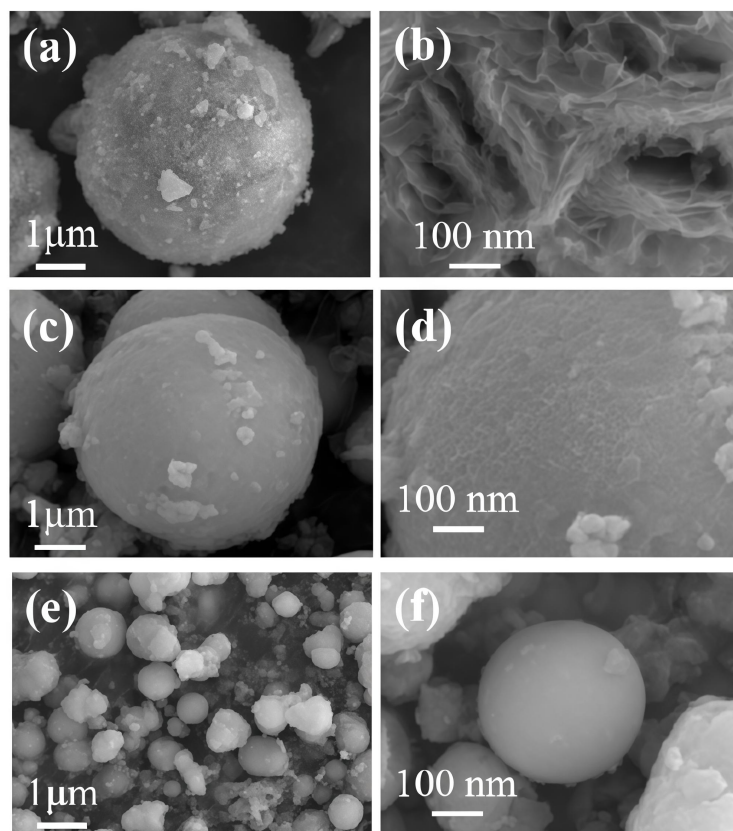

**Fig. S8** SEM images of (a, b) Zn-Co LDHs, (c, d) Zn-Ni LDHs and (e, f) Co-Ni LDHs.

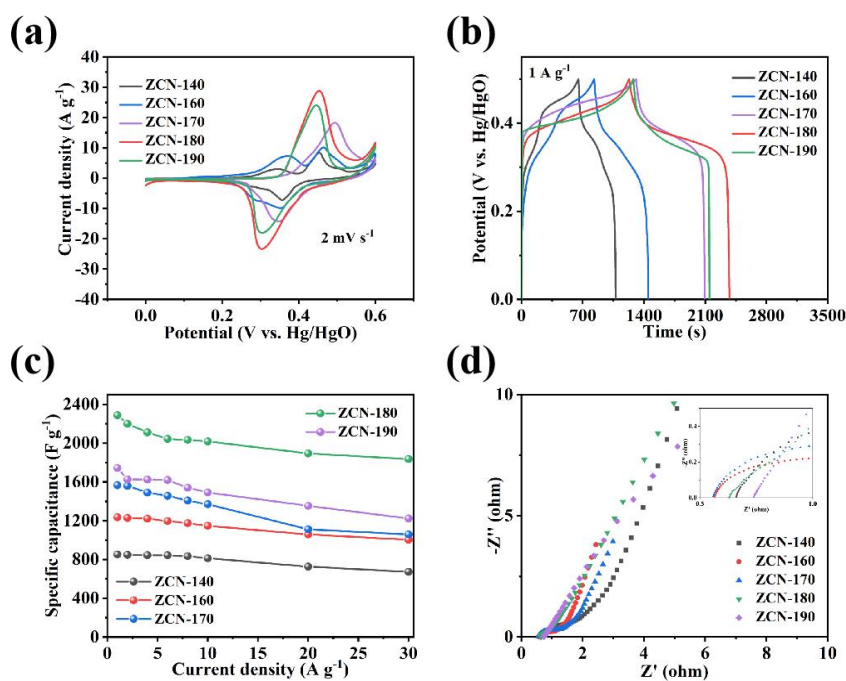

**Fig. S9** Samples prepared at different temperatures (140, 160, 170, 180, and 190 °C): (a) CV curves at a scan rate of  $2\ mV\ s^{-1}$ , (b) GCD curves at a current density of  $1\ A\ g^{-1}$ , (c) Specific capacitance plots at different current densities and (d) EIS plots.

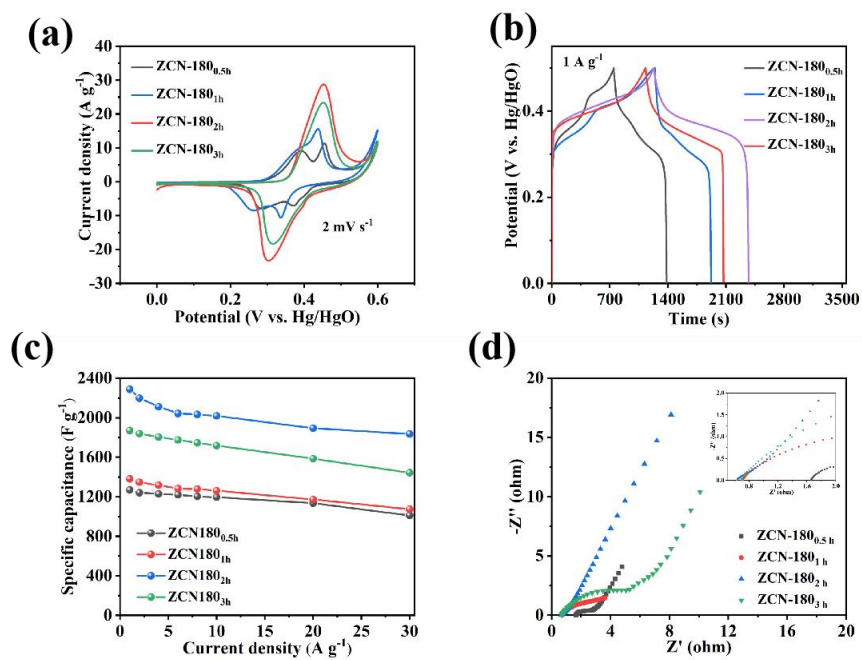

**Fig. S10** Samples from solvothermal reaction at 180 °C with different durations (0.5 h, 1 h, 2 h, 3 h): (a) CV curves at  $2 \text{ mV s}^{-1}$ , (b) GCD curves at  $1 \text{ A g}^{-1}$ , (c) Specific capacitance plots at different current densities and (d) EIS plots.

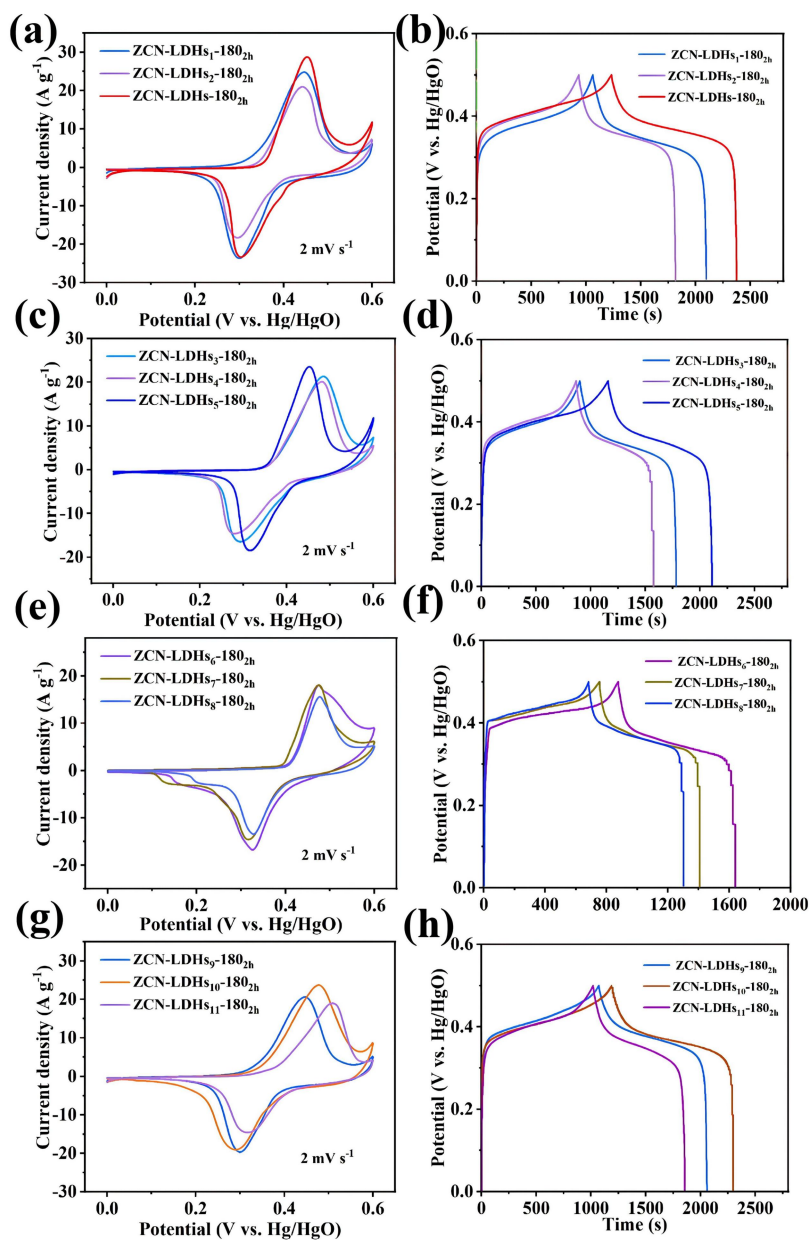

**Fig. S11** Electrochemical performance of ZCN-LDHs samples with different component ratios: (a, c, e, and g) CV curves measured at a scan rate of  $2 \text{ mV s}^{-1}$ , and (b, d, f, and h) GCD curves tested at a current density of  $1 \text{ A g}^{-1}$ .

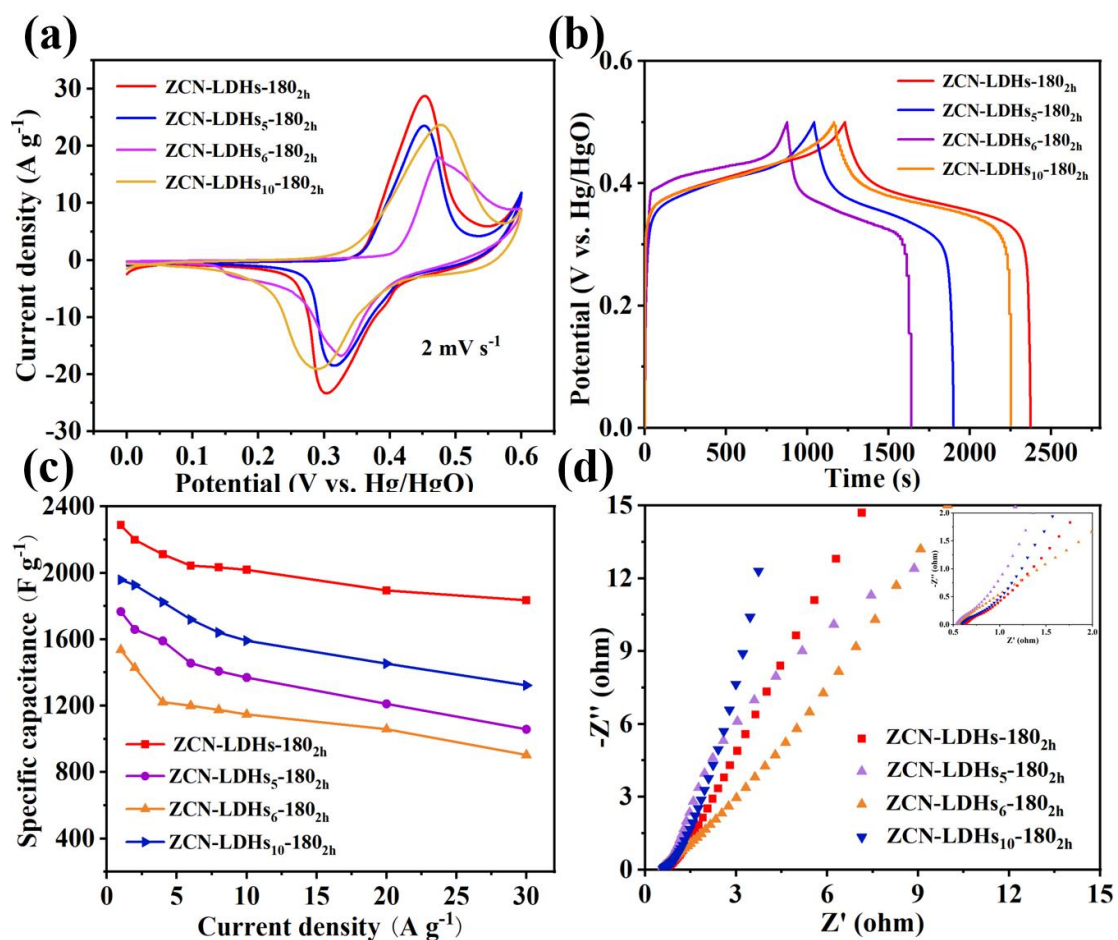

**Fig. S12** Samples of ZCN-LDHs-180<sub>2h</sub>, ZCN-LDHs<sub>5</sub>-180<sub>2h</sub>, ZCN-LDHs<sub>6</sub>-180<sub>2h</sub>, and ZCN-LDHs<sub>10</sub>-180<sub>2h</sub>: (a) CV curves at a scan rate of 2 mV s<sup>-1</sup>, (b) GCD curves at a current density of 1 A g<sup>-1</sup>, (c) Specific capacitance plots at different current densities, and (d) EIS plots.

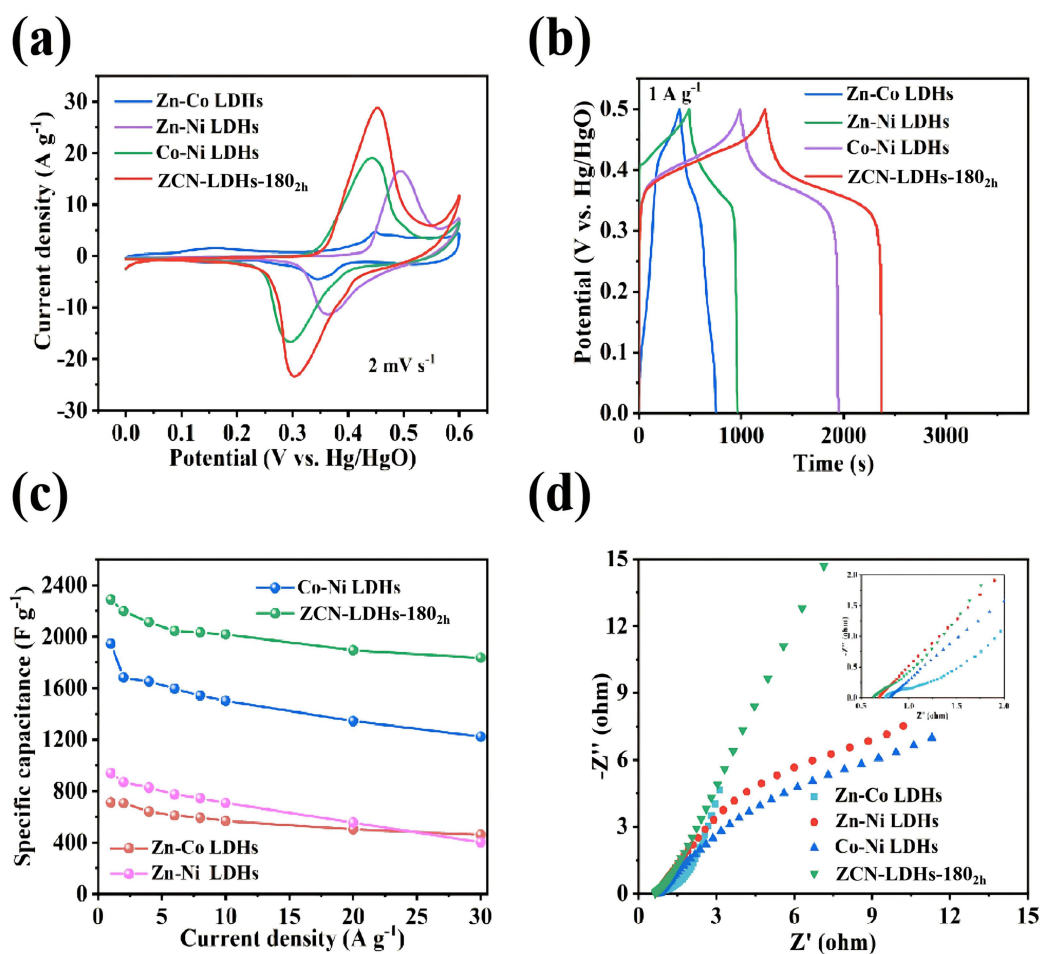

**Fig. S13** Samples of ZC-LDHs, ZN-LDHs, CN-LDHs, and ZCN-LDHs-180<sub>2h</sub>: (a) CV curves at a scan rate of 2 mV s<sup>-1</sup>, (b) GCD curves at a current density of 1 A g<sup>-1</sup>, (c) Specific capacitance plots at different current densities, and (d) EIS plots.

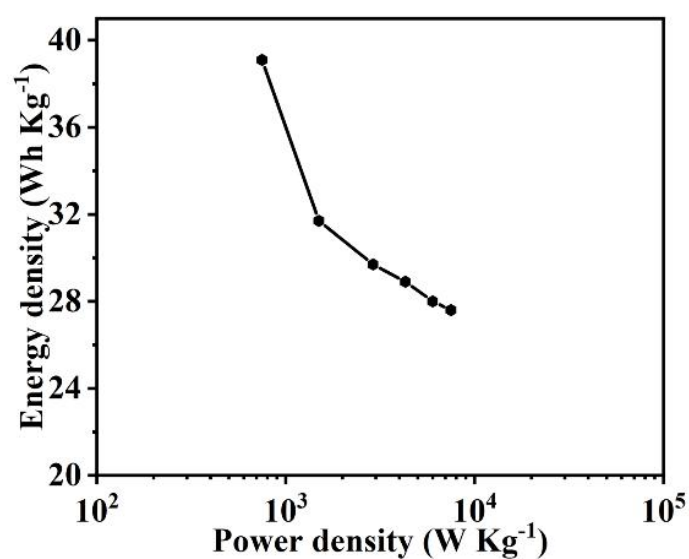

**Fig. S14** Ragone plot of ZCN-LDHs-180<sub>2h</sub>//AC.

**Table S1** Performance comparison of this work with other similar works.

| <b>Materials</b>                              | <b>Capacity (F g<sup>-1</sup>)</b> | <b>Capacity retention</b> | <b>Ref</b> |
|-----------------------------------------------|------------------------------------|---------------------------|------------|
| Co-Ni LDH                                     | 1634.1 (1 A g <sup>-1</sup> )      | 81.7% (10000 cycles)      | 1          |
| Co <sub>3</sub> O <sub>4</sub> @CoNi-LDH      | 2676.9 (1 A g <sup>-1</sup> )      | 67.7% (10000 cycles)      | 2          |
| Mg-Co-Al LDHs/rG-x                            | 1204 (1 A g <sup>-1</sup> )        | 90.5% (20000 cycles)      | 3          |
| CoNi LDH@rGO@CoNi <sub>2</sub> S <sub>4</sub> | 2101 (1 A g <sup>-1</sup> )        | 72% (6000 cycles)         | 4          |
| MnCo-LDH/S-NiCo-LDH@NF                        | 1581.3 (1 A g <sup>-1</sup> )      | 87% (10000 cycles)        | 5          |
| NiFeAl LDHs                                   | 1652.2 (0.5 A g <sup>-1</sup> )    | 54.9% (1000 cycles)       | 6          |
| ZCN-LDHs-180 <sub>2h</sub>                    | 2288 (1 A g <sup>-1</sup> )        | 84.8% (12000 cycles)      | This work  |

**Table S2. Comparison of energy densities between this work and others.**

| <b>Materials</b>                             | <b>Energy density (Wh kg<sup>-1</sup>)</b> | <b>Power density (W kg<sup>-1</sup>)</b> | <b>Ref</b> |
|----------------------------------------------|--------------------------------------------|------------------------------------------|------------|
| ZnCoS/ZnCoLDH//AC                            | 36.4                                       | 850                                      | 7          |
| ZnCo LDH@Ni <sub>3</sub> S <sub>2</sub> //AC | 39                                         | 423                                      | 8          |
| Co(OH)F/Ni(OH) <sub>2</sub> //AC             | 13.8                                       | 470                                      | 9          |
| NiCo LDH-C <sub>3</sub> N <sub>4</sub> //AC  | 33                                         | 401                                      | 10         |
| Mg-Co-Ni LDHs//AC                            | 44.3                                       | 800                                      | 3          |
| CoNi LDH NFs//AC                             | 30.1                                       | 748                                      | 11         |
| ZCN-LDHs-180 <sub>2h</sub> //AC              | 39.1                                       | 750                                      | This work  |

## References

- 1 Z. Song, Q. Meng, F. Wei, Q. Yin, Y. Sui, J. Qi, *J. Electroanal. Chem.*, 2023, **936**, 117379.
- 2 J.-J. Zhou, Q. Li, C. Chen, Y.-L. Li, K. Tao, L. Han, *Chem. Eng. J.*, 2018, **350**, 551-558.
- 3 Y. Yao, Y. Yu, L. Wan, C. Du, Y. Zhang, J. Chen, M. Xie, *J. Colloid Interface Sci.*, 2023, **649**, 519-527.
- 4 J. Hu, L. Sun, F. Xie, Y. Qu, H. Tan, X. Shi, J. Qian, K. Wang, Y. Zhang, *J. Mater. Chem. A*, 2022, **10**, 21590-21602.
- 5 Y.-C. Hsiao, C.-H. Liao, C.-S. Hsu, S. Yougbaré, L.-Y. Lin, Y.-F. Wu, *J. Energy Storage*, 2023, **57**, 106171.
- 6 B. Ramulu, J.A. Shaik, A.R. Mule, J.S. Yu, *Mater. Sci. Eng. R Rep.*, 2024, **160**, 100820.
- 7 Y. Cao, J. Wang, L. Zhong, J. Zhou, A. Fang, Q. Wang, Y. Zhao, J. Li, J. Gong, Y. Dai, *J. Energy Storage*, 2025, **110**, 115250.
- 8 F. Vahedizadeh, S. Moraveji, L. Fotouhi, M. Zirak, S. Shahrokhian, *J. Energy Storage*, 2024, **94**, 112460.
- 9 X. Li, R. Ding, W. Shi, Q. Xu, D. Ying, Y. Huang, E. Liu, *Electrochim. Acta*, 2018, **265**, 455-473.
- 10 Y. Tan, Y. Ren, Y. Zhang, *J. Energy Storage*, 2024, **81**, 110367.
- 11 E. Bao, X. Ren, Y. Wang, Z. Zhang, C. Luo, X. Liu, C. Xu, H. Chen, *J. Energy Storage*, 2024, **82**, 110535.
